# Supplementary material
Source: publisher site journal article supplement (https://www.dovepress.com/article/617816)
Supplement: Supplementary file 1 [file 617816%20Supplementary%20Material.docx]

**Section 1. Supplementary Table COREQ (Consolidated Criteria for Reporting Qualitative Research) — 32-item checklist (single combined table; English)**

**Source:** Final manuscript provided (pp. 1–21).
**Note: NR = Not Reported** (not explicitly reported in the manuscript).

| **Topic** | **Item No.** | **Guide Questions/Description** | **Reported on Page No.** |
| --- | --- | --- | --- |
| Domain 1: Research team and reflexivity – Personal characteristics |  |  |  |
| Interviewer/facilitator | 1 | Which author/s conducted the interview or focus group? | p6 (conducted by the first author, Naufal Hafizh Fauzan) |
| Credentials | 2 | What were the researcher’s credentials? e.g. PhD, MD | p6 (reported only as “Master’s student in Nursing with a specialization in Medical-Surgical Nursing”) |
| Occupation | 3 | What was their occupation at the time of the study? | p6 (“oncology nursing background throught 2024” noted; “Master’s student in Nursing with a specialization in Medical-Surgical Nursing” noted) |
| Gender | 4 | Was the researcher male or female? | p6 (“a male researcher” noted) |
| Experience and training | 5 | What experience or training did the researcher have? | p6 (“researcher’s oncology nursing background” noted; training “during his graduate studies, with intensive guidance” noted) |
| Domain 1: Research team and reflexivity – Relationship with participants |  |  |  |
| Relationship established | 6 | Was a relationship established prior to study commencement? | p7 (“no prior clinical or personal contact had occurred with the participants recruited for this study.”) |
| Participant knowledge of the interviewer | 7 | What did the participants know about the researcher? e.g. personal goals, reasons for doing the research | p5 (aims/procedures, discomfort, confidentiality, voluntary participation explained) |
| Interviewer characteristics | 8 | What characteristics were reported about the interviewer/facilitator? e.g. Bias, assumptions, reasons and interests in the research topic | p5 (reflexive journal mentioned); p7 (conducted interview simulations before the formal data collection process began) |
| Domain 2: Study design – Theoretical framework |  |  |  |
| Methodological orientation and Theory | 9 | What methodological orientation was stated to underpin the study? e.g. grounded theory, discourse analysis, ethnography, phenomenology, content analysis | p4 (reflexive thematic analysis; inductive orientation; Braun & Clarke) |
| Domain 2: Study design – Participant selection |  |  |  |
| Sampling | 10 | How were participants selected? e.g. purposive, convenience, consecutive, snowball | p5 (purposive sampling; variation by urban/rural, age, clinical status) |
| Method of approach | 11 | How were participants approached? e.g. face-to-face, telephone, mail, email | p5 (approached during routine visits; identified with staff support) |
| Sample size | 12 | How many participants were in the study? | p1 (Abstract: 10); p5 (Participants: 10) |
| Non-participation | 13 | How many people refused to participate or dropped out? Reasons? | NR (No participants refused to participate or withdrew) |
| Domain 2: Study design – Setting |  |  |  |
| Setting of data collection | 14 | Where was the data collected? e.g. home, clinic, workplace | p5 (setting: Jasa Kartini Hospital services; interviews conducted at participants’ residences); p7 (Interview location: participants’ residences) |
| Presence of non-participants | 15 | Was anyone else present besides the participants and researchers? | NR (The interview is conducted at the participant’s residences; only the participant should be present during the interview, and family members are asked not to accompany the participant, explained during the informed consent discussion) |
| Description of sample | 16 | What are the important characteristics of the sample? e.g. demographic data | p20 (Table 1 demographic/clinical characteristics); p8 (brief description in Results section lead-in) |
| Domain 2: Study design – Data collection |  |  |  |
| Interview guide | 17 | Were questions, prompts, guides provided by the authors? Was it pilot tested? | p6 (semi-structured interviews stated)  pp6-7 (guide content; no pilot testing was conducted; interview simulations were conducted) |
| Repeat interviews | 18 | Were repeat interviews carried out? If yes, how many? | p7 (Repeat interviews: not conducted) |
| Audio/visual recording | 19 | Did the research use audio or visual recording to collect the data? | p6 (audio-recorded) |
| Field notes | 20 | Were field notes made during and/or after the interview or focus group? | p6 (field notes used) |
| Duration | 21 | What was the duration of the interviews or focus group? | p6 (~30 minutes) |
| Data saturation | 22 | Was data saturation discussed? | p5 (The study included 10 participants, a number deemed sufficient for phenomenological research based on recommendations by Polit and Beck, as cited in Timmins, and methodological guidance provided by Creswell.)  p5 (limiting the study to 10 participants was also justified sufficiently rich and comprehensive understanding) |
| Transcripts returned | 23 | Were transcripts returned to participants for comment and/or correction? | pp7-8 (the full transcripts were not returned to participants for formal revision) |
| Domain 3: Analysis and findings – Data analysis |  |  |  |
| Number of data coders | 24 | How many data coders coded the data? | p6 (one; by first author) |
| Description of the coding tree | 25 | Did authors provide a description of the coding tree? | p7 (provided in the Supplementary Materials – Section 2) |
| Derivation of themes | 26 | Were themes identified in advance or derived from the data? | p4 (inductive orientation); p7 (Braun & Clarke six-phase analysis described) |
| Software | 27 | What software, if applicable, was used to manage the data? | p7 (manual approach) |
| Participant checking | 28 | Did participants provide feedback on the findings? | p7 (end-of-interview clarification: key phrases summarized and confirmed; no report of checking final themes/findings) |
| Domain 3: Analysis and findings – Reporting |  |  |  |
| Quotations presented | 29 | Were participant quotations presented to illustrate the themes/findings? Was each quotation identified? e.g. participant number | pp8–11 (overview of themes; quotes presented and labeled P1–P10); p21 (note on translation and Supplementary Materials - Section 4) |
| Data and findings consistent | 30 | Was there consistency between the data presented and the findings? | pp8–11 (overview of themes; themes in Table 2 and narrative supported by quotations) |
| Clarity of major themes | 31 | Were major themes clearly presented in the findings? | pp8–11 (overview of themes; Table 2; theme-by-theme narrative) |
| Clarity of minor themes | 32 | Is there a description of diverse cases or discussion of minor themes? | p21 (data-derived subthemes in Table 2); pp8–11 (variation across journey described in narrative) |

**Section 2. Supplementary Table Theme Analysis: Supportive Care Needs and Patient Preferences**

| **Quote (Original Indonesian)** | **Quote (English translation)** | **Significance Statement (Data)** | **Subtheme** | **Theme** |
| --- | --- | --- | --- | --- |
| “Sebelum berobat saya belum tau penyakit ini kanker yang berbahaya, saya kira tidak berbahaya.” (P1)  “Tadinya saya berpikir ini bukan penyakit kanker payudara.” (P2)  “Kirain yang sekarang sama juga abses, dan kesalahan saya menunda pengobatan.” (P9) | “Before seeking treatment, I didn’t know this was dangerous breast cancer; I thought it wasn’t serious.” (P1)  “I initially thought this wasn't breast cancer.” (P2)  “I thought it was just an abscess; I previously had one and it was cured with medicine.” (P9) | Not realizing that breast cancer is a dangerous disease. | Limited knowledge | **Theme 1. Informational and health-system support needs shaping early help-seeking** |
| Di daerah ini tidak ada penyuluhan… Semoga nanti bisa berjalan dengan rutin penyuluhan… jadi orang orang bakal tidak se-awam saya…” (P3)  “Saya menyesal karena tidak ada yang memberi tahu saya tentang kanker… sekarang saya seperti ini karena kurangnya informasi.” (P3) | “In my area there was no health education… I hope there will be regular sessions so people won’t be as unaware as I was…” (P3)  “I regret this because no one informed me about cancer… I ended up like this due to a lack of information.” (P3) | We hope that regular health education sessions will be held in our community so that people are not uninformed. | Lack of health education | **Theme 1** |
| “Kan banyak masukan kemo… ada juga sodara yang meninggal… Jadi saya takut buat memutuskan siap kemo nya…” (P3)  “Saya takut kemo sejak ada cerita tetangga dan tetangga saya meninggal… setelah kemo ke 4 tiba-tiba ngedrop langsung meninggal” (P8-2)  “Mendengar kata kemo dan operasi itu menyeramkan... pokoknya pengobatan medis itu sesuatu yang menyeramkan” (P4) | “There were many comments that after chemo people died… so I was afraid to decide to start chemotherapy.” (P3)  “I've been afraid of chemo since I heard stories from my neighbors… who dropped and died after their 4th session.” (P8)  “Hearing the words 'chemo' and 'surgery' is terrifying... it's a scary thing.” (P4) | I’m afraid to start chemotherapy because I’ve heard stories about people who died after undergoing it. | Chemotherapy fear | **Theme 1** |
| “Bulan maret itu pertama kemonya, gatau waktu itu kalau di JK bisa di kemo…” (P3)  “...semuanya harus dirujuk ke Bandung... kaya yang ini tuh ga boleh berobat ditasik.” (P3) | “My first chemo was in March; I didn’t know chemotherapy services were available at this hospital (JK).” (P3)  “I was told I had to go to Bandung for chemo; I didn't know it was possible here... all facilities kept referring me far away.” (P3) | Not knowing that chemotherapy services are available at the local hospital. | Confusion about service access | **Theme 1** |
| “Keluarga… selalu ada membantu… menemani ibu kontrol… Ibu merasa begitu semangat…” (P9)  “Alhamdulillah anak saya dari awal sampai sekarang selalu menemani saya berobat... Tidak ada hal lagi yang membuat ibu semangat selain anak saya” (P8) | “My family was always there… accompanying me to appointments… that made me feel motivated.” (P9)  “My child has always accompanied me for treatment from the beginning until now; that's the only thing that keeps me spirited.” (P8) | I feel energized and motivated because my family is always there with me during my medical checkups. | Family support/accompaniment | **Theme 2. Preferences for psychosocial support: family involvement and peer/survivor support** |
| “Suami mendukung saya harus berobat… dari awal itu pengen cepet harus berobat…” (P7)  Suami saya bilang ‘jangan memikirkan hal apapun, yang penting sembuh mau tidak ada dua-duanya pun kesembuhan ibu yang paling utama’.” (P4) | “My husband supported me to get treatment… from the beginning he wanted me to seek care quickly.” (P7)  “My husband said, 'don't worry about anything, your recovery is the most important, even if you lose both breasts'.” (P4) | A husband’s support from the very beginning is crucial in helping to speed up treatment. | Spousal support | **Theme 2** |
| “Sering ketemu… sama sama yang… berjuang… saling support gitu…” (P2)  “Malahan jadi enjoy aja karena menemukan teman seperjuangan yang tidak pernah mengeluh... saya jadi termotivasi harus lebih kuat.” (P8)  “Alhamdulillah… dipertemukan dengan teman-teman… saling mendukung.” (P8)  “Saya menyadari ternyata yang seperti saya itu banyak dan saya tidak sendiri… ternyata orang lain pun bisa melewatinya bahkan ada yang sudah 10 tahun, 11 tahun” (P4) | “I often met others who were going through it too… we supported each other.” (P2)  “It became enjoyable because I found many fellow fighters who never complained; I felt motivated to be stronger.” (P8)  “I met many friends… we supported one another.” (P8)  “I realized I wasn't alone; many others have survived for 10 or 11 years.” (P4) | Supporting one another as fellow cancer survivors helps reduce feelings of loneliness. | Peer motivation | **Theme 2** |
| “Dari mendekatkan diri kepada Allah merupakan motivasi… saya punya harapan dan berpasrah diri…” (P2)  Dari mendekatkan diri kepada Allah motivasi yang sangat besar… saya berpasrah diri kepada Allah apapun hasilnya… saya percaya Allah memberikan yang terbaik…” (P2)  “… Saya sering merenung dan berdoa di kamar saya sampai saya nangis baru bisa mengobati ketakutan saya…” (P6) | “Getting closer to God became a strong motivation… I had hoped and surrendered the outcome.” (P2)  “Getting closer to God brings sudden strength… I surrender everything to Him… with the confidence that He provides what is best…” (P2)  “… I often reflect and pray in my room until I cry to soothe my fears…” (P6) | Drawing closer to God brings strength, hope, and a sense of surrender. | Prayer/dhikr/spiritual coping | **Theme 3. Preferences for spiritual support and meaning-oriented coping** |
| “Keluarga besar Ibu suka rutin mengadakan pengajian… sangat mempengaruhi kondisi mental saya, jadi lebih tenang…” (P9) | “Our extended family holds regular religious gatherings… it really helped my mental state and made me calmer.” (P9) | Attending regular family religious study sessions helps calm the mind. | Religious gatherings | **Theme 3** |
| “Jadi harus ada juga yang ngasih siraman-siraman rohani, kalau tidak ada itu suka ada perasaan menyalahkan…” (P4)  Kita harus paham bahwa kita itu orang-orang pilihan… hal itu membuat ibu tidak ada perasaan menyalahkan, kecewa, depresi, tidak bisa sabar.” (P4)  “Keluarga besar Ibu suka rutin mengadakan pengajian… Mereka selalu mengingatkan saya untuk selalu mengingat Allah dan berdoa… Hal-hal seperti ini menurut saya sangat mempengaruhi kondisi mental saya, jadi lebih tenang dan selalu siap menghadapi pengobatan.” (P9) | “There needs to be spiritual guidance; without it, I would blame myself…” (P4)  “We must be given understanding that we are chosen people (by God)… this prevents feelings of blaming, disappointed, depressed, impatient.” (P4)  “My extended family regularly holds religious gatherings... they always remind me to remember Allah and pray... it greatly affects my mental state, making me calmer and ready for treatment.” (P9) | Spiritual guidance is needed to prevent feelings of self-blame from arising. | Spiritual guidance | **Theme 3** |
| “Ibu pernah kontrolnya terlambat, karena tidak ada yang mengantar ibu…” (P1)  “Ibu pernah kontrolnya terlambat, karena tidak ada yang mengantar ibu… Kaki ibu terasa semakin nyeri jika telat berobat.” (P1-110, 112, 116, 122) | “I was late for follow-up because no one could take me…” (P1)  “If I’m late for my chemo meds because no one can take me for a checkup… the pain in my legs becomes worse.” (P1) | Had to postpone a checkup because no family members were available to drive me to the hospital. | Lack of accompaniment | **Theme 4. Practical and non-medical financial support needs despite insurance coverage** |
| “Harusnya ke Bandung… tapi keluarga tidak ada yang bisa mengantar.” (P1)  “Pengen mencoba berobat ke bandung… semoga… ada yang bisa mengantar ke Bandung untuk disinar…” (P1) | “I should have gone to Bandung (a referral center), but no family member could accompany me.” (P1)  “I wanted to go to Bandung for radiotherapy… I hope someone can accompany me there.” (P1) | Difficulty accessing referral services outside the city due to transportation and escort issues. | Referral-center access | **Theme 4** |
| “Kondisi ekonomi nya belum bisa stabil… saya kumpulkan dulu uang… baru mulai berobat dan baru bikin BPJS.” (P7)  “Waktu itu saya harus mengumpulkan uang buat persiapan anak saya masuk SD... Saya belum siap juga kalo harus membuat saya mengeluarkan uang demi kepentingan saya juga.” (P9) | “My financial situation wasn’t stable… I saved money first, then started treatment and registered for insurance.” (P7)  “I had to save money for my child's elementary school first... I wasn't ready to spend money on my own needs.” (P9) | You must first raise funds to cover operational costs before beginning treatment. | Non-medical costs | **Theme 4** |
| “Awalnya… dunia seperti hancur… seperti kematian tuh didepan mata.” (P4)  “… Saya pesimis, seperti tidak ada jalan untuk sembuh dan kayak yang saya itu bakal hidup sebentar lagi.” (P4) | “At first it felt like my world collapsed… like death was right in front of me.” (P4)  “… I felt hopeless, as if there was no path to recovery and death was imminent.” (P4) | I felt like my world had fallen apart and I was terrified of death when I was first diagnosed. | Sadness/fear/distress | **Theme 5. Evolving needs across the treatment journey: distress, regret, coping, and acceptance (including death acceptance)** |
| “Saya kadang suka merasa menyesal kenapa dulu tuh saya tidak langsung saja mau untuk di kemo…” (P3)  “Saya menyesal, coba kalo saya berobatnya dari awal ke rumah sakit sejak merasa ada benjolan itu, mungkin sekarang saya sudah sembuh…” (P10) | “Sometimes I regret why I didn’t agree to chemo earlier…” (P3)  “I feel regret now; if only I had gone to the hospital from the start when I felt the lump, maybe I'd be cured…” (P10) | I feel regret for not agreeing to chemotherapy sooner in the past. | Regret | **Theme 5** |
| “Terima kasih banyak… dengan bercerita merasa lebih lega…” (P3)  “Lebih nyamannya kalo cerita ke suami karena dia menenangkan saya juga... Sekarang banyak teman seperjuangan juga sering bertukar cerita jadi alhamdulillah sangat membantu buat mengungkapkan unek unek saya. ….” (P6-90, 94) | “Thank you… talking about it makes me feel relieved.” (P3)  “I feel more comfortable talking to my husband because he calms me down... sharing with fellow fighters also helps...” (P6) | I feel much better now that I’ve had the chance to talk things through and vent my frustrations. | Coping through conversation | **Theme 5** |
| “Alhamdulillah saya sudah lebih tenang, siap menghadapi kematian… semoga… khusnul khotimah…” (P5)  “Bisa dibilang sekarang ibu tidak takut tentang kematian karena ibu sudah pasrah juga… Hanya meminta yang terbaik kepada Allah” (P10)  “Saya menerima siap menghadapi kematian karena anak-anak sudah pada nikah... Jadi saya sudah tidak khawatir lagi… Ibu siap menghadapi kematian.” (P5) | “I feel calmer now and ready to face death… I pray for a good ending.” (P5)  “I'm not afraid of death now because I have surrendered… I only ask for the best from God.” (P10)  “I'm ready because my children are married… I have no more worries… I am ready to face death.” (P5) | Feeling more at peace and having expressed a willingness to face death. | Death acceptance | **Theme 5** |

**Section 3. Supplementary Table Demographic and Complete Diagnosis of Participants (N=10)**

| **ID** | **Religion** | **Married** |  | **Clinical diagnosis at the start of treatment*** | **Current diagnosis at Interview** |
| --- | --- | --- | --- | --- | --- |
| P1 | Islam | Widowed |  | Right Breast Cancer Stage.IV, Femur Sinistra Metastatic | Right Breast Cancer Stage IV, Femur Sinistra Metastatic, Submandibular and Intrapulmonal Metastases |
| P2 | Islam | Married |  | Right Breast Cancer Stage IV, Intrapulmonal Metastatic | Right Breast Cancer Stage.IV + Left Breast Cancer Stage II (Metachronous), Intrapulmonary Metastatic, on hormone therapy |
| P3 | Islam | Married |  | Left Breast Cancer Stage.IV, Bone Metastases (L3–L5, S1) | Suspected Contralateral Breast Cancer, Bone Metastases (L3–L5, S1), Submandibular and Sebaceous Metastases. |
| P4 | Islam | Married |  | Left Breast Cancer Stage IV, Intrapulmonal Metastatic | Left Breast Cancer Stage IV, Right Brest Cancer Stage II (Metachronous) on chemotherapy, Intrapulmonal Metastatic (Stable Disease) |
| P5 | Islam | Widowed |  | Left Breast Cancer Stage III | Left Breast Cancer Stage IV (Recurrent Carcinoma Mammae), Limfoma Axilla Dextra and Lung Metastases |
| P6 | Islam | Widowed |  | Right Breast Cancer Stage IV, Intrapulmonal Metastatic | Suspect Recurrent Carcinoma Mammae Stage IV, Intrapulmonal Metastatic (Stable Disease) |
| P7 | Islam | Married |  | Right Breast Cancer Stage III | Right Breast Cancer Stage III (Complete Remission) |
| P8 | Islam | Widowed |  | Right Breast Cancer Stage III | Right Breast Cancer III, Suspect Benign Cerebellum, Hydrocephalus post VP Shunt |
| P9 | Islam | Divorce |  | Left Breast Cancer Stage III | Left Breast Cancer Stage III (Complete Remission) |
| P10 | Islam | Married |  | Right Breast Cancer Stage IV, Intrahepatal Metastatic | Right Breast Cancer Stage IV, Intrahepatal Metastatic, Moderate Ascites |

**Note:**

***Clinical diagnosis at the start of treatment:** Data were obtained based on the medical diagnosis recorded in the medical records, as well as the anatomical pathology report and other supporting examination results, when the participant first began breast cancer treatment at the hospital.

**Section 4. Supplementary Table Illustrative Quotes (Original Indonesian and English Translation)**

Quotes were translated from Indonesian to English by the authors for publication purposes. Identifiers were removed and participants are referenced by code (P1–P10).

| **Theme** | **Participant** | **Quote (Original Indonesian)** | **Quote (English translation)** | **Analytic note (Need/Preference)** |
| --- | --- | --- | --- | --- |
| Theme 1 | P1 | “Sebelum berobat saya belum tau penyakit ini kanker yang berbahaya, saya kira tidak berbahaya.” | “Before seeking treatment, I didn’t know this was dangerous breast cancer; I thought it wasn’t serious.” | Need: credible information; early recognition |
| Theme 1 | P3 | “Di daerah ini tidak ada penyuluhan… Semoga nanti bisa berjalan dengan rutin penyuluhan… jadi orang orang bakal tidak se-awam saya…” | “In my area there was no health education… I hope there will be regular sessions so people won’t be as unaware as I was…” | Preference: regular education; Need: community-based information |
| Theme 1 | P3 | “Kan banyak masukan kemo… ada juga sodara yang meninggal… Jadi saya takut buat memutuskan siap kemo nya…” | “There were many comments that after chemo people died… so I was afraid to decide to start chemotherapy.” | Need: reassurance, address misinformation/fear |
| Theme 1 | P3 | “Bulan maret itu pertama kemonya, gatau waktu itu kalau di JK bisa di kemo…” | “My first chemo was in March; I didn’t know chemotherapy services were available at this hospital.” | Need: service navigation/access clarity |
| Theme 2 | P9 | “Keluarga… selalu ada membantu… menemani ibu kontrol… Ibu merasa begitu semangat…” | “My family was always there… accompanying me to appointments… that made me feel motivated.” | Preference: family involvement; Need: accompaniment/emotional support |
| Theme 2 | P7 | “Suami mendukung saya harus berobat… dari awal itu pengen cepet harus berobat…” | “My husband supported me to get treatment… from the beginning he wanted me to seek care quickly.” | Preference: spousal support; Need: encouragement/decision support |
| Theme 2 | P2 | “Sering ketemu… sama sama yang… berjuang… saling support gitu…” | “I often met others who were going through it too… we supported each other.” | Preference: peer support; Need: normalization |
| Theme 2 | P8 | “Alhamdulillah… dipertemukan dengan teman-teman… saling mendukung.” | “I met many friends… we supported one another.” | Preference: peer support; Need: emotional strengthening |
| Theme 3 | P2 | “Dari mendekatkan diri kepada Allah merupakan motivasi… saya punya harapan dan berpasrah diri…” | “Getting closer to God became a strong motivation… I had hoped and surrendered the outcome.” | Preference: spiritual coping; Need: hope/calmness |
| Theme 3 | P9 | “Keluarga besar Ibu suka rutin mengadakan pengajian… sangat mempengaruhi kondisi mental saya, jadi lebih tenang…” | “Our extended family holds regular religious gatherings… it really helped my mental state and made me calmer.” | Preference: community-based spiritual support |
| Theme 3 | P4 | “Jadi harus ada juga yang ngasih siraman-siraman rohani, kalau tidak ada itu suka ada perasaan menyalahkan…” | “There needs to be spiritual guidance; without it, I would blame myself…” | Need: spiritual guidance; coping support |
| Theme 4 | P1 | “Ibu pernah kontrolnya terlambat, karena tidak ada yang mengantar ibu…” | “I was late for follow-up because no one could take me…” | Need: transport/accompaniment; adherence barrier |
| Theme 4 | P1 | “Harusnya ke Bandung… tapi keluarga tidak ada yang bisa mengantar.” | “I should have gone to Bandung (a referral center), but no family member could accompany me.” | Need: referral access + accompaniment |
| Theme 4 | P1 | “Pengen mencoba berobat ke bandung… semoga… ada yang bisa mengantar ke Bandung untuk disinar…” | “I wanted to go to Bandung for radiotherapy… I hope someone can accompany me there.” | Preference: complete care; Need: logistics |
| Theme 4 | P7 | “Kondisi ekonomi nya belum bisa stabil… saya kumpulkan dulu uang… baru mulai berobat dan baru bikin BPJS.” | “My financial situation wasn’t stable… I saved money first, then started treatment and registered for insurance.” | Need: non-medical financial support |
| Theme 5 | P4 | “Awalnya… dunia seperti hancur… seperti kematian tuh didepan mata.” | “At first it felt like my world collapsed… like death was right in front of me.” | Need: distress support; emotional crisis |
| Theme 5 | P3 | “Saya kadang suka merasa menyesal kenapa dulu tuh saya tidak langsung saja mau untuk di kemo…” | “Sometimes I regret why I didn’t agree to chemo earlier…” | Need: counseling/support for regret; decision support |
| Theme 5 | P3 | “Terima kasih banyak… dengan bercerita merasa lebih lega…” | “Thank you… talking about it makes me feel relieved.” | Preference: safe space to talk; Need: emotional expression |
| Theme 5 | P5 | “Alhamdulillah saya sudah lebih tenang, siap menghadapi kematian… semoga… khusnul khotimah…” | “I feel calmer now and ready to face death… I pray for a good ending.” | Need: end-of-life supportive/spiritual care; acceptance |
